# Supplementary material for: More Than Ninety Percent of the Light Energy Emitted by Near-Infrared Laser Therapy Devices Used to Treat Musculoskeletal Disorders Is Absorbed Within the First Ten Millimeters of Biological Tissue
Source: Preprints.org preprint supplement (doi:10.20944/preprints202211.0175.v1), 2022-11-09
Supplement: Supplementary file 1 [file LaserPaper Supplement.docx]

More than ninety percent of the light energy emitted by near-infrared laser therapy devices used to treat musculoskeletal disorders is absorbed within the first ten millimeters of biolog-ical tissue

Leon Kaub 1 and Christoph Schmitz 1,*

1 Department of Anatomy II, Faculty of Medicine, LMU Munich, 80331 Munich, Germany; leon.kaub@med.uni-muenchen.de

***** Correspondence: christoph_schmitz@med.uni-muenchen.de; Tel.: +49-89-2180-72620

Supplementary Material

**Table S1.** Details about the biological tissue specimens used for penetration depth measurements.

| **Tissue** | **Chicken muscle** | **Porcine muscle** | **Beef muscle** | **Beef muscle** | **Porcine skin** | **Beef fat** | **Beef tendon** | **Porcine bone** |
| --- | --- | --- | --- | --- | --- | --- | --- | --- |
| Number of samples | 12 | 15 | 10 | 9 | 9 | 6 | 3 | 6 |
| Minimum thickness [mm] | 1.90 | 1.60 | 2.35 | 2.45 | 4.20 | 2.00 | 2.55 | 14.0 |
| Maximum thickness [mm] | 15.0 | 14.0 | 24.0 | 21.0 | 21.0 | 16.5 | 13.0 | 16.0 |


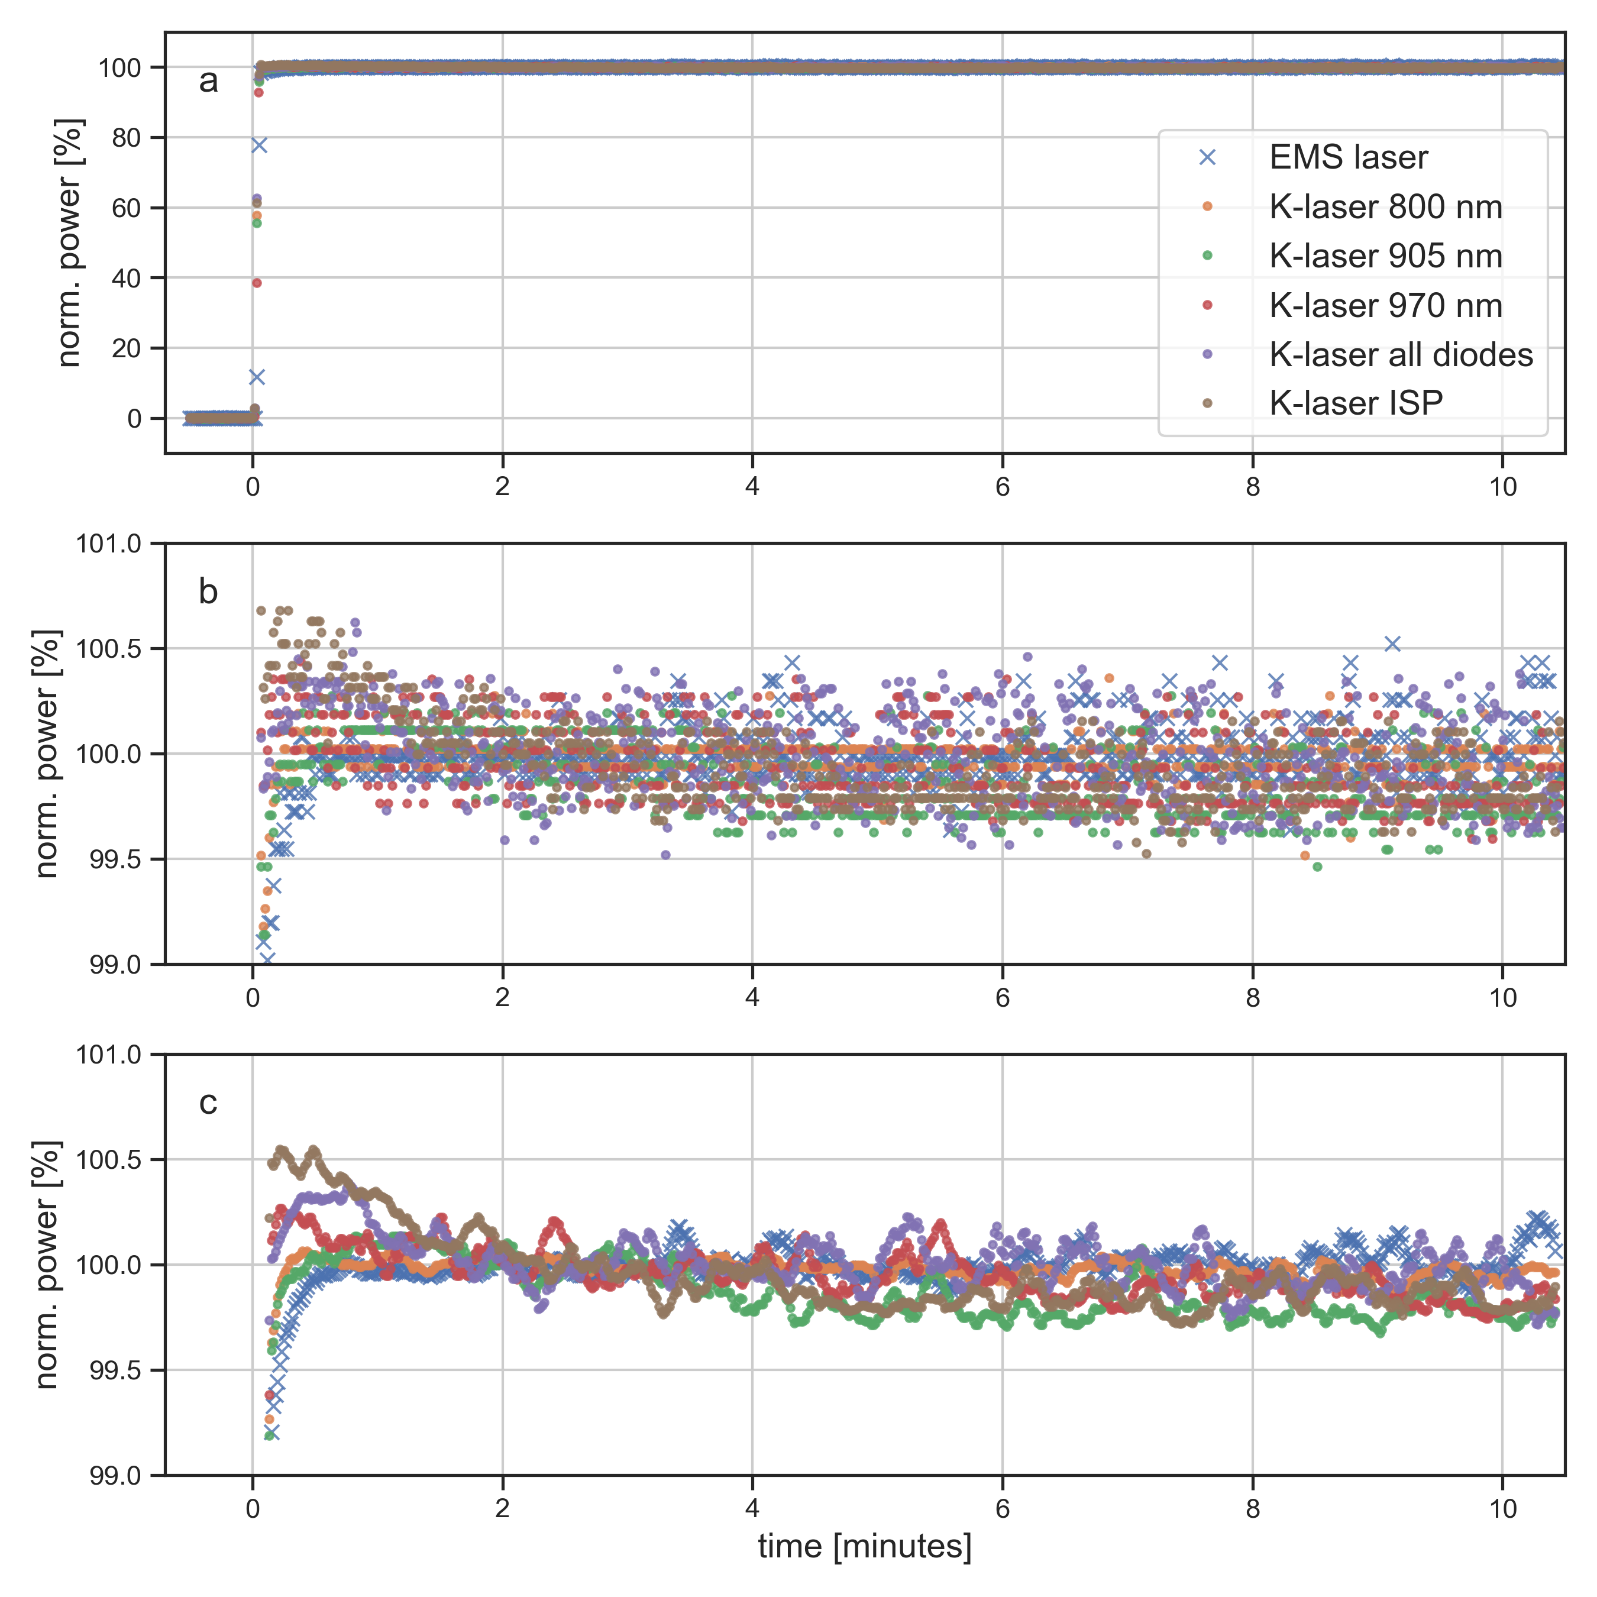


**Figure S1**: Power of the EMS laser and the K-laser with its different modes measured for a time period of 10 minutes. The power measurements of each signal were normalized to the mean value between minute two and minute 4. The same signals were plotted showing the full range (**a**) and showing the range around 100% in detail (**b, c**). The signals were recorded with a power sensor that operated with a sampling rate of 1 Hz. The signals are plotted directly (**a, b**) as well as after applying a moving-average filter with a window length of 10 samples (**c**). It can be seen that after the laser therapy devices were switched on, the power remained stable within 1% for the recorded ten minutes. The K-laser operated in ISP mode showed a minor initial overshoot of 0.7%, but stabilized after two minutes.


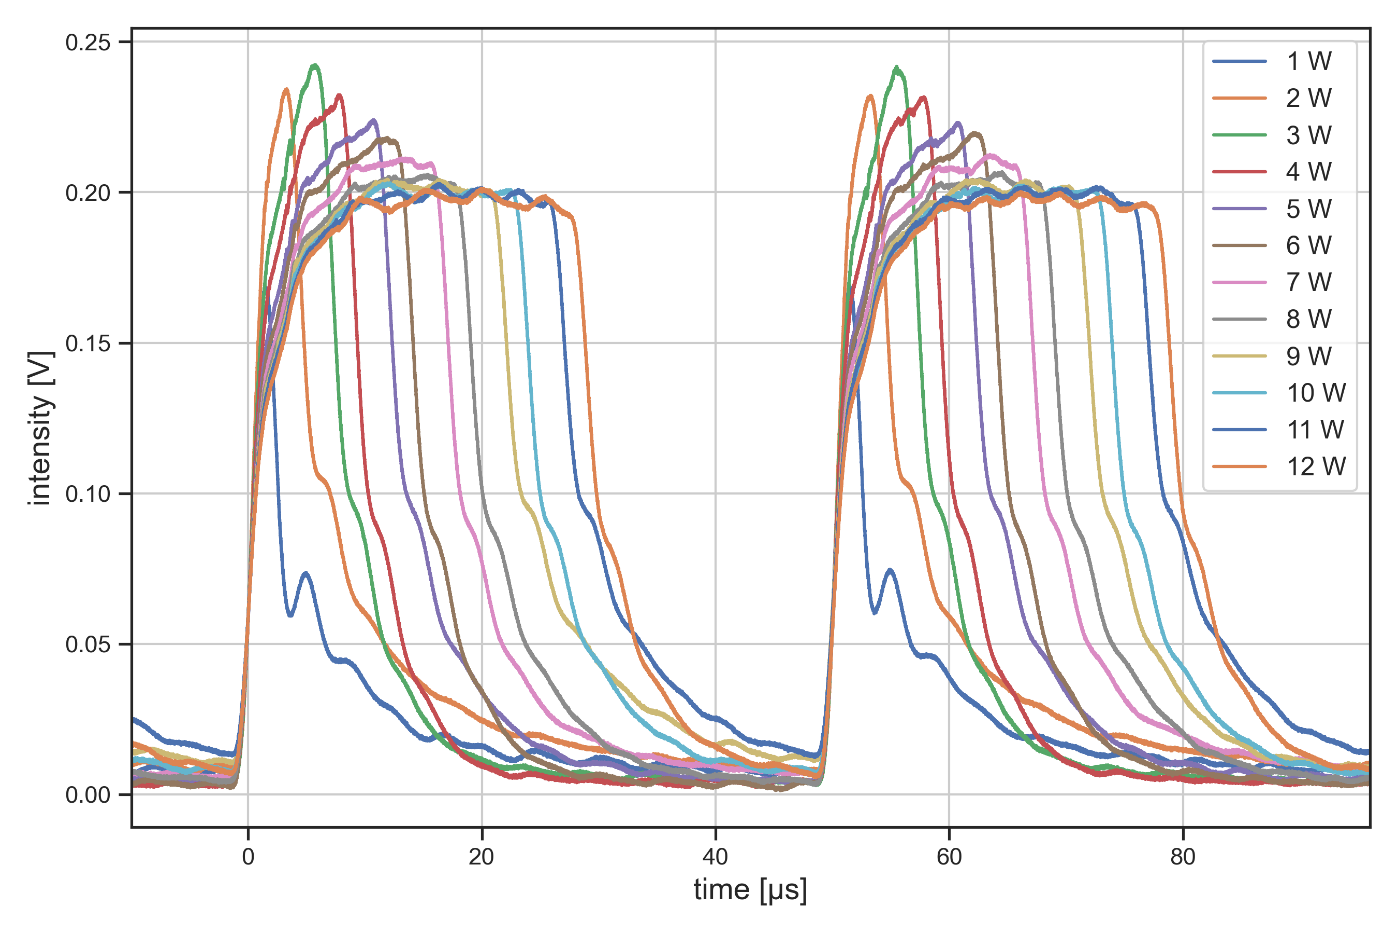


**Figure S2**: Light intensity in time for the K-laser's ISP mode at different set powers. The intensity was recorded using the fast photodiode connected to the oscilloscope, which recorded the signals in Volts.


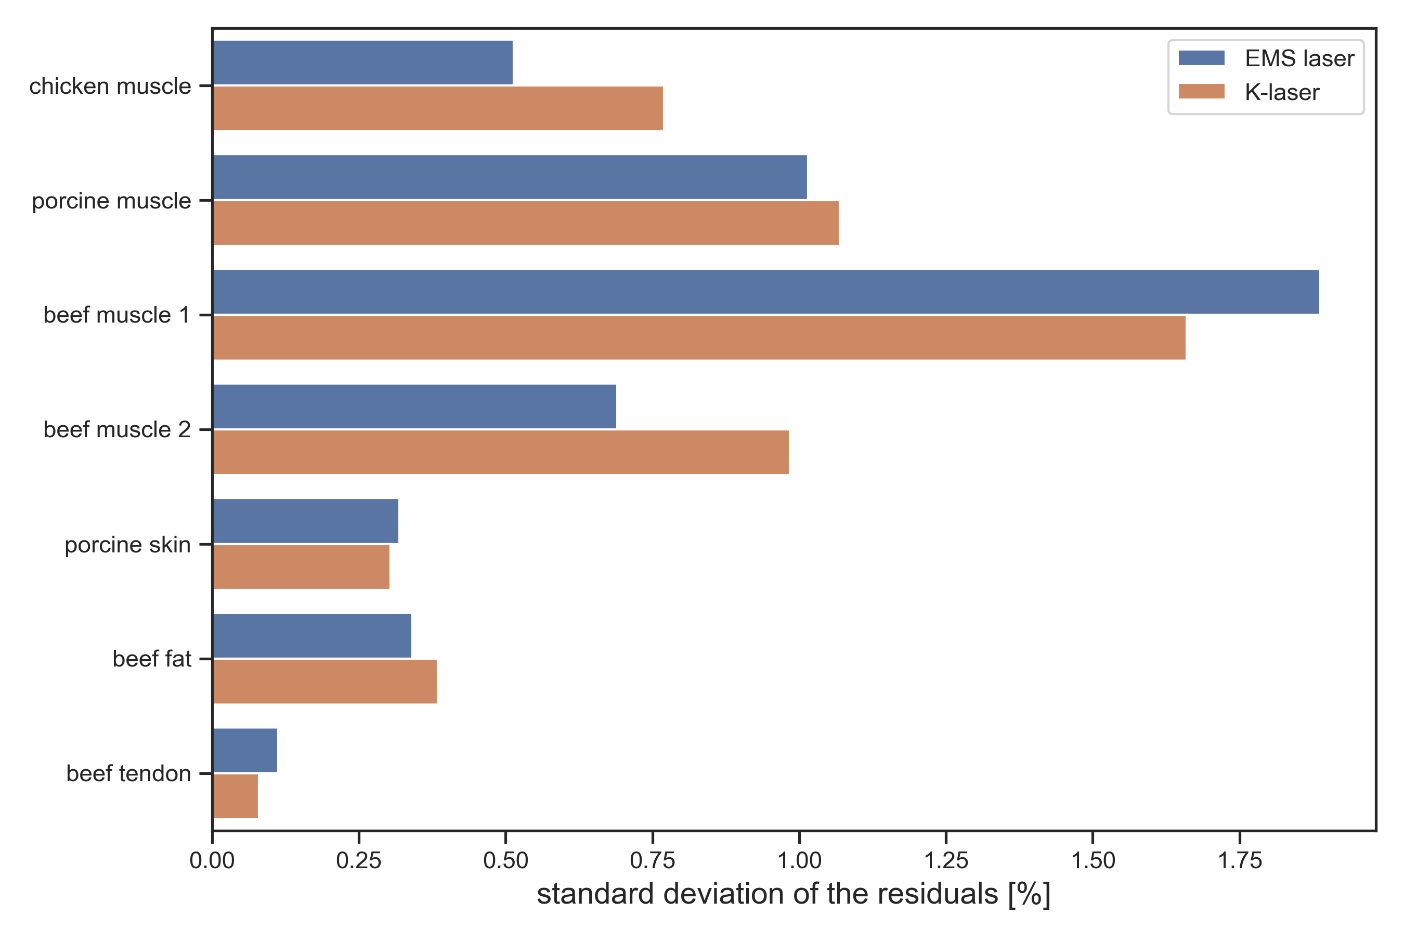


**Figure S3**: Standard deviations of the residuals after computing best-fitting curves for the penetration depth curves for different tissues.
